# Supplementary material for: Acupuncture for postherpetic neuralgia: a systematic review protocol
Source: PubMed Central journal article supplement — BMJ Open. 2014 Nov 12;4(11):e005725. doi: 10.1136/bmjopen-2014-005725 (PMC4244400; doi:10.1136/bmjopen-2014-005725), 2014-11-12
Supplement: bmjopen-2014-005725.draft_revisions.pdf [file bmjopen-2014-005725.draft_revisions.pdf]

# BMJ Open

## Acupuncture for post-herpetic neuralgia: a systematic review protocol

|                                 |                                                                                                                                                                                                                                                                                                                                                   |
|---------------------------------|---------------------------------------------------------------------------------------------------------------------------------------------------------------------------------------------------------------------------------------------------------------------------------------------------------------------------------------------------|
| Journal:                        | <i>BMJ Open</i>                                                                                                                                                                                                                                                                                                                                   |
| Manuscript ID:                  | bmjopen-2014-005725                                                                                                                                                                                                                                                                                                                               |
| Article Type:                   | Protocol                                                                                                                                                                                                                                                                                                                                          |
| Date Submitted by the Author:   | 20-May-2014                                                                                                                                                                                                                                                                                                                                       |
| Complete List of Authors:       | LI, Wang; Beijing University of Traditional Chinese Medicine, PENG, Weina; Guang'anmen Hospital, China Academy of Chinese Medical Sciences, Department of acupuncture<br>Zhou, Jing; Beijing University of Traditional Chinese Medicine, LIU, Zhishun; Guang'anmen Hospital, China Academy of Chinese Medical Sciences, Department of acupuncture |
| <b>Primary Subject Heading</b>: | Complementary medicine                                                                                                                                                                                                                                                                                                                            |
| Secondary Subject Heading:      | Evidence based practice, Medical publishing and peer review, Dermatology                                                                                                                                                                                                                                                                          |
| Keywords:                       | DERMATOLOGY, COMPLEMENTARY MEDICINE, Protocols & guidelines < HEALTH SERVICES ADMINISTRATION & MANAGEMENT, Neurological pain < NEUROLOGY, PAIN MANAGEMENT                                                                                                                                                                                         |
|                                 |                                                                                                                                                                                                                                                                                                                                                   |

SCHOLARONE™  
Manuscripts

1  
2  
3  
4  
5  
6  
7  
8  
9  
10  
11  
12  
13  
14  
15  
16  
17  
18  
19  
20  
21  
22  
23  
24  
25  
26  
27  
28  
29  
30  
31  
32  
33  
34  
35  
36  
37  
38  
39  
40  
41  
42  
43  
44  
45  
46  
47  
48  
49  
50  
51  
52  
53  
54  
55  
56  
57  
58  
59  
60

**Acupuncture for post-herpetic neuralgia: a systematic review protocol**

Wang LI<sup>1,2</sup>, Weina PENG<sup>1</sup>, Jing ZHOU<sup>1,2</sup>, Zhishun LIU<sup>1\*</sup>

1 Department of acupuncture, Guang'anmen Hospital, China Academy of Chinese Medical Sciences, Beijing (100053), China.

2 Beijing University of Traditional Chinese Medicine, Beijing (100029), China.

\*Correspondence to: Prof. Zhishun LIU; Tel: 86-10-88001124; E-mail: liuzhishun@aliyun.com

Running Title: Acupuncture for post-herpetic neuralgia: a protocol

Keywords: acupuncture, postherpetic neuralgia, systematic review, protocol, randomized controlled trials

Word Count: 1839

For peer review only

## Abstract

**Background:** Post-herpetic neuralgia (PHN) is a syndrome characterized by pain persisting more than 3 months following the resolution of herpes zoster (HZ). PHN frequently resolves spontaneously over time and the efficacy of the treatments for PHN is evaluated unclearly. Acupuncture has a history of over 2000 years in both the prevention and treatment of diseases. Preliminary searches for recent 5 years have revealed more than 137 studies of acupuncture for treating PHN, and benefit of the treatment group was reported between 84.1% and 97.5%. The objective of this systematic review is to assess the efficacy and safety of acupuncture for PHN in pain-relieving and pain-removing.

**Methods/design:** This systematic review will electronically search multiple databases and hand search a list of medical journals, and will contact authors to identify studies. Two reviewers will independently screen reports and extract data. Primary outcome is pain intensity measured by Visual Analogue Scale (VAS), etc., and secondary outcomes are global impression, quality of life, safety measured by incidence and severity of adverse effects and costs. Meta-analysis will be conducted by pooling risk ratio for dichotomous data, standardized or weighted mean difference for continuous data.

**Conclusion:** This review will accumulate the current evidence on the efficacy and safety of acupuncture for PHN. Furthermore, it will benefit policy makers, patients, and clinicians seeking innovative and effective ways to achieve pain relief and removal for PHN.

**Dissemination:** This study will be disseminated through peer-review publication or conference presentation.

**Trial registration:** PROSPERO registration number: CRD42014009555

**Keywords:** acupuncture, postherpetic neuralgia, systematic review, protocol, randomized controlled trials

## STRENGTHS AND LIMITATIONS OF THIS STUDY

This systematic review will be the first one to assess the efficacy and safety of acupuncture for PHN. And it will provide a high-quality synthesis of current evidence for policy makers, patients, and clinicians seeking innovative and effective ways to treat PHN.

The ability to generate conclusions of high confidence in this study may be limited, due to the heterogeneity in the forms of acupuncture therapies and the qualities of methodology, and the impossibility of searching in all the electronic databases or other data sources.

## Background

Post-herpetic neuralgia (PHN) is a syndrome characterized by pain persisting more than 3 months following the resolution of herpes zoster (HZ) <sup>[1-4]</sup>. In addition, the clinical manifestations include allodynia, dysesthesia and pruritus along the distribution of the involved dermatome. The incidence of PHN is 4/1000 per year, which further increases to 12/1000 among people over 80 years old <sup>[5]</sup>. The relevant risk factors for PHN include old age, female gender, greater severity of acute pain, greater rash severity, the degree of sensory impairment, psychological distress, a painful prodrome, diabetes mellitus, nutritional deficiencies and diminished cell-mediated immunity <sup>[6-10]</sup>. However, the most relevant risk factor is old age <sup>[11-12]</sup>. It is uncommon for people under 50 years old, but approximately 83% of PHN occurring above <sup>[13]</sup>.

Due to the persisting or intermittent spontaneous pain, post-herpetic neuralgia brings a serious impact on the patients' daily activities (e.g. dressing, bathing, sleep), quality of life, general health, psychological health (e.g. depression and difficulty with concentration), and social and economic well-being <sup>[14-15]</sup>. Though the pathophysiology of PHN is poorly understood, postmortem studies in patients with PHN have found demyelination and axonal loss both peripheral nerves and sensory roots <sup>[16]</sup>.

Because PHN frequently resolves spontaneously over time and the efficacy of the treatments for PHN is evaluated unclearly <sup>[17-18]</sup>, pain reduction may be incorrectly attributed to current treatments for PHN. There are conventional treatments for PHN, such as tricyclic antidepressants (TCAs), antiepileptics, opioids, tramadol, lidocaine and capsaicin, which are probably effective to relieve some of the pain for a period of time. However, approximately 50% of patients may not obtain satisfactory analgesia despite treatments with these medications <sup>[4]</sup>. Moreover, being the first-line treatment suggested worldwide for PHN, TCAs and antiepileptics (gabapentin and pregabalin) still bring a high incidence of adverse events (AEs), including sedation, xerostomia, confusion, dysrhythmia, weight gain, dizziness, somnolence, fatigue and ataxia <sup>[18-21]</sup>.

Acupuncture, which has a history of more than 2000 years in both the prevention and treatment of diseases, plays an important role in Traditional Chinese Medicine (TCM). Kinds of acupuncture methods such as fire needling, electro-acupuncture, surrounding needling, pyonex, pricking blood and cupping are in use for the treatment of PHN in hospitals in China. Preliminary searches for recent 5 years have revealed more than 137 studies of acupuncture for treating PHN. And benefit of the treatment group was reported between 84.1% and 97.5 % <sup>[22-24]</sup>. The clinical trials indicate that acupuncture could reduce pain and discomfort among most patients and remove pain and discomfort among some patients.

However, the efficacy and safety of acupuncture for PHN have not been systematically reviewed. Thus, this systematic review is conducted to assess the efficacy and safety of acupuncture for PHN in pain-relieving and pain-removing.

## METHODS AND ANALYSIS

### Criteria for considering studies for this review

**Type of studies**

Randomized controlled trials (RCTs) will be included without restriction of language or publication type. Moreover, the trials using open label, single blind and double blind design will all be included, while cross-over designs and quasi- RCTs will be excluded.

**Type of participants**

The participants, who had been diagnosed as post-herpetic neuralgia defined as pain persisting over 3 months after resolution of the rash, will be all focused on. No restrictions on age, gender or race.

**Types of interventions**

Any form of acupuncture therapy used in experimental group will be included, involving acupuncture, electro-acupuncture, elongated needle, three-edged needle, fire needling, auricular acupuncture, pyonex, moxibustion, pricking blood, and cupping.

The control interventions with no treatment control, sham acupuncture control (non-point acupuncture, minimal acupuncture), placebo control and drug therapy control will be included.

Studies with the following comparisons will be included:

1. Acupuncture versus another therapy.
2. Acupuncture with another therapy versus the same other therapy.

**Types of outcome measures***Primary outcomes*

1. Pain intensity as measured by Visual Analogue Scale (VAS), Numerical Rating Scale (NRS), Verbal Rating Scale (VRS), the Faces Pain Scale-Revised (FPS-R), etc.

*Secondary outcomes*

1. Global impression
2. Quality of life
3. Safety as measured by incidence and severity of adverse effects
4. Costs

**Search methods for identification of studies**

A search strategy will be designed and conducted according to the guidance of the Cochrane handbook <sup>[25]</sup>.

**Electronic searches**

We will search the following databases:

1. the Cochrane Skin Group Trials Register(the inception to 2014.1)
2. MEDLINE(the inception to 2014.1)
3. EMBASE(the inception to 2014.1)
4. the Cochrane Central Register of Controlled Trials (CENTRAL) (the inception to 2014.1)
5. Chinese Biomedical Literature Database (CBM) (the inception to 2014.1)

6. Chinese Medical Current Content (CMCC) (the inception to 2014.1)
7. China National Knowledge Infrastructure (CNKI) (the inception to 2014.1)

This review will use the following search terms: postherpetic neuralgia, PHN, herpes zoster, shingles and acupuncture, electro-acupuncture, elongated needle, fire needling, auricular acupuncture, pyonex, moxibustion, pricking blood, three-edged needle, cupping. This study will adapt this strategy to search all the above databases.

There will be no restriction on language or publication type. The search strategy for MEDLINE can be found in Appendix 1.

### **Searching other resources**

Hand search a list of medical journals in university libraries, such as Chinese Acupuncture & Moxibustion(1981-2014.1), Journal of Clinical Acupuncture & Moxibustion(1985-2014.1), Shanghai Journal of Acupuncture & Moxibustion(1982-2014.1) and Acupuncture Research(1976-2014.1).

### **Data collection and analysis**

#### **Selection of studies**

A procedure for screening will be discussed and developed before the start of selection. Both the outputs searched electronically and the studies obtained from other sources will be cited in a database created by NoteExpress software. Two reviewers (LW and ZJ) will independently screen all the titles and abstracts of studies to find out the duplicates, as well as to review the studies and decide whether they will be included according to the predefined inclusion criteria. If there are studies that could not be clearly included based on both titles and abstracts, full copies will be screened. Once any disagreement occurs, it will be resolved through discussion and resolved by reaching a consensus among the two reviewers (LW and ZJ), or consult of a third arbitrator (LZS). In addition, the kappa value will be used to calculate the consistency evaluation between reviewers.

#### **Data extraction and management**

Data extractors (LW and ZJ) will independently extract data from the included trials by using a piloted data extraction form which is discussed and developed by all the reviewers. The extracted data will include data for trails, participants, interventions, outcomes and miscellaneous items such as funding sources and ethical approval. Any disagreement in data extraction will be resolved by discussion or consult of a third arbitrator (LZS). If data presented in studies is unclear, missing, or presented in a form that is either un-extractable or difficult to reliably extract, the authors of the study will be contacted for clarification.

#### **Assessment of risk of bias in included studies**

According to the Cochrane Handbook of Systematic Reviews of Interventions<sup>[25]</sup>, the reviewers will firstly access six domains of each trial (sequence generation, allocation concealment, blinding, incomplete outcome data, selective outcome reporting and 'other issues'), then summarize the assessments, and at last categorize the included trials into 3 levels of bias: low, unclear and high

1  
2  
3 risk of bias. The risk of bias will be assessed independently. Any disagreements will be resolved  
4 by discussion or consult of a third arbitrator.  
5  
6

### 7 **Measures of treatment effect**

8 Where continuous scales of measurement are used to assess the effects of treatment, the  
9 weighted mean difference (WMD) with 95% confidence intervals (CI) will be used, or the  
10 standardized mean difference (SMD) with 95%CI if different measurement tools and units have  
11 been used. For dichotomous outcomes results will be expressed as the relative risk (RR) with  
12 95%CI.  
13  
14

### 15 **Unit of analysis issues**

16 Studies with multiple intervention groups will be included. Each intervention group will be  
17 compared to the single control group.  
18  
19

### 20 **Dealing with missing data**

21 The authors of the included studies will be contacted to get further information if there are any  
22 missing or insufficient data from the trials. And relevant data obtained in this manner will be  
23 included in the review. The intent-to-treat (ITT) principle (available case analysis and full  
24 intent-to-treat analysis) will be applied for statistical analysis, without getting the missing data.  
25  
26  
27

### 28 **Assessment of heterogeneity**

29 Heterogeneity will be investigated by the  $I^2$  statistic ( $I^2$  to or more than 50% was considered  
30 indicative of heterogeneity) and the chi-squared ( $\chi^2$ , or  $Chi^2$ ) test <sup>[25]</sup>. The  $Chi^2$  test will use an  
31 alpha of 0.1 for statistical significance and the P-value to be less than 0.1 will be accepted as  
32 heterogeneity.  
33  
34  
35

### 36 **Assessment of reporting biases**

37 Funnel plots will be used to assess reporting biases, if ten or more studies are included in a  
38 meta-analysis. Such a funnel plot asymmetry could be caused by publication or related biases, or  
39 by systematic differences between small and large studies. If a relationship is identified, the  
40 clinical diversity of the studies will be further examined as a possible explanation and described  
41 in the text. However, because graphical evaluation can be subjective, Egger's method will also be  
42 used to assess the reporting biases <sup>[26]</sup>.  
43  
44  
45

### 46 **Data synthesis**

47 The Revman 5.1 software will be used to conduct Meta analysis and calculate the RR with 95%CI  
48 for the dichotomous data, the WMD or the SMD with 95%CI for continuous data during synthesis.  
49 If the same outcome measurement tool and unit is used, the WMD with 95%CI will be calculated,  
50 or SMD with 95%CI instead. If the included studies exist heterogeneity, the P value is less than  
51 0.1, the RR, the WMD, or the SMD will be calculated by the random effects model. Otherwise, it  
52 will be calculated by a fixed effect model.  
53  
54  
55

### 56 **Subgroup analysis**

57 Subgroup analysis will be performed based on different controls, interventions, durations of  
58  
59  
60

1  
2  
3 treatment, and outcome measures. Adverse effects will be tabulated and assessed with  
4 descriptive techniques.  
5  
6

### 7 **Sensitivity analysis**

8 For the sensitivity analysis, the meta-analysis will repeat, substituting decisions alternatively to  
9 test the robustness of the primary decisions of the review process<sup>[27]</sup>. The decision nodes are  
10 principally the methodological qualities, the sample size and the option of using missing data  
11 (available case analysis and full intent-to-treat analysis).  
12  
13

### 14 **Discussion**

15 PHN brings a significant adverse impact on patients' daily activities, quality of life, general health,  
16 psychological health, and social and economic well-being. Acupuncture therapy is a suggested  
17 intervention in China that may have value to treat PHN, but no high-quality synthesis of the  
18 evidence exists.  
19  
20

21 This study might have kind of limitations that may limit its ability to generate conclusions based  
22 on high confidence. Specifically, there may be significant heterogeneity in the forms of  
23 acupuncture therapies used and the qualities of methodology. There will also likely be  
24 differences in outcomes measured and tools used. Inherent uncertainty exists by pooling this  
25 data within constructed domains.  
26  
27

28 This review has not searched studies in more electronic databases or a grey list, which could limit  
29 the broad search of RCTs to generate the findings.  
30  
31

### 32 **Conclusion**

33 This systematic review will accumulate the current evidence on the efficacy and safety of  
34 acupuncture for PHN. And it will benefit policy makers, patients, and clinicians seeking innovative  
35 and effective ways to achieve pain relief and removal for PHN.  
36  
37

38 **Authors' contributions:** Wang LI and Zhishun LIU contributed to the conception of the study. The manuscript of  
39 the protocol was drafted by Wang LI, and was revised by Weina PENG. The search strategy was developed by all  
40 authors and run by Wang LI and Jing ZHOU, who will also independently screen the potential studies, extract data  
41 of included studies, assess the risk of bias and finish data synthesis. Zhishun LIU will arbitrate the disagreements  
42 and ensure that no errors occur during the study. All authors approved for the publication of the protocol.  
43  
44  
45

46 **Funding statement:** This research received no specific grant from any funding agency in the public, commercial  
47 or not-for-profit sectors.  
48  
49

50 **Competing interests:** No competing interests exist.  
51  
52

53 **Ethical approval:** This research does not need ethical approval because data we used will not be linked to  
54 individual data and privacy.  
55  
56  
57  
58  
59  
60



**Reference**

1. Johnson RW: The future of predictors, prevention, and therapy in postherpetic neuralgia. *Neurology* 1995; 45(12 Suppl 8):S70-72.
2. Katz J, Cooper EM, Walther RR, Sweeney EW, Dworkin RH: Acute pain in herpes zoster and its impact on health-related quality of life. *Clin Infect Dis* 2004;39(3):342-348.
3. Hope-Simpson RE: The Nature of Herpes Zoster: a Long-Term Study and a New Hypothesis. *Proc R Soc Med* 1965;58:9-20.
4. Goßrau G. Postzosterneuralgie. *Schmerz*. 2014;28: 93-104.
5. Merskey HH, Bogduk N. Classification of Chronic Pain: Descriptions of Chronic Pain Syndrome and Definitions of Pain Terms. 2nd ed. Seattle, WA: IASP Press; 2012:212–213.
6. ZHANG Dongli, HE Li. Risk factors and preventive measures of postherpetic neuralgia. *Chinese rehabilitation medicine*. 2005;9(37):118-119.
7. Ducic, Ivica; Felder, John Matthew. Peripheral Nerve Surgery for the Treatment of Postherpetic neuralgia. *Annals of Plastic Surgery*, October 2013;71(4):384-385 *Peripheral Nerve Surgery and Research*
8. Chen JY, Chang CY, Feng PH, Chu CC, So EC, Hu ML. Plasma vitamin C is lower in postherpetic neuralgia patients and administration of vitamin C reduces spontaneous pain but not brush-evoked pain. *Clin J Pain*. 2009;25:562–569.
9. Chen JY, Chu CC, Lin YS, Cheng So E, Shieh JP, Hu ML. Nutrient deficiencies as a risk factor in Taiwanese patients with postherpetic neuralgia. *Br J Nutr*. 2011 Apr;8: 1–9.
10. Dworkin RH, Schmader KE. The epidemiology and natural history of herpes zoster and postherpetic neuralgia. In: Watson CPN, ed. *Herpes zoster and postherpetic neuralgia*, 2nd ed. Amsterdam: Elsevier; 2001:39–65.
11. Donahue JG, Choo PW, Manson JE, Platt R: The incidence of herpes zoster. *Arch Intern Med* 1995; 155(15):1605-1609.
12. Yawn BP, Saddier P, Wollan PC, St Sauver JL, Kurland MJ, Sy LS: A population-based study of the incidence and complication rates of herpes zoster before zoster vaccine introduction. *Mayo Clin Proc* 2007; 82(11):1341-1349.
13. Yawn BP, Saddier P, Wollan PC, et al. A population-based study of the incidence and complication rates of herpes zoster before zoster vaccine introduction. *Mayo Clin Proc* 2007;82: 1341-1349.
14. Kenneth E. Schmader, M.D. Epidemiology and Impact on Quality of Life of Postherpetic Neuralgia and Painful Diabetic Neuropathy. *The Clinical Journal of Pain*. 2002;18:350–354
15. NICE. NICE clinical guideline 96. Neuropathic pain: the pharmacological management of neuropathic pain in adults in non-specialist settings. National Institute for Health and Clinical Excellence. <http://www.nice.org.uk/guidance/CG96> (accessed 5 June 2010).
16. Decroix J, Partsch H, Gonzalez R, et al. Factors influencing pain outcome in herpes zoster: an observational study with valaciclovir. *J Eur Acad Dermatol Venereol* 2000; 14: 23-33
17. Panlilio LM, Christo PJ, Raja SN. Current management of postherpetic neuralgia. *Neurologist* 2002; 8 (6): 339-350
18. Paul J. Christo, Greg Hobelmann, David N. Maine. Post-Herpetic Neuralgia in Older Adults. *Drugs Aging* 2007; 24 (1): 1-19
19. Rowbotham M, Harden N, Stacey B, Bernstein P, Magnus-Miller L. Gabapentin for the treatment of postherpetic neuralgia: a randomized controlled trial. *JAMA* 1998;280: 1837-1842.

- 1
- 2
- 3 20. Rice AS, Maton S, Postherpetic Neuralgia StudyGroup. Gabapentin in postherpetic neuralgia:  
4 a randomised, double blind, placebo controlled study. *Pain* 2001; 94:215-224.
- 5
- 6 21. Van Marwijk HWJ, Bijl D, Adegrove HJ, et al. Antidepressant prescription for depression in  
7 general practice in the Netherlands. *Pharm World Sci* 2001; 23(2): 46-49
- 8 22. Gong Jing. Treatment of 40 Cases of post-herpetic neuralgia with Bloodletting and cupping.  
9 *Guide of China Medicine*.2013 July;11(20):292-293
- 10 23. Zhao Ruiqin. Treatment of 40 Cases of post-herpetic neuralgia with Bloodletting. *Shanxi*  
11 *Journal of TCM*.2011;32(5):595-597
- 12 24. Fang Xiaoyu, Han Limin, Wu Hongyu. Therapeutic Effect Observation on the treatment of  
13 post-herpetic neuralgia with electroacupuncture. *People's military medical*.2013;12:1427-1428
- 14 25. JPT CHH, Green S. Cochrane handbook for systematic reviews of interventions version 5.1.  
15 0[updated March 2011]. The Cochrane Collaboration 2011
- 16 26. Egger M, Davey Smith G, Schneider M, Minder C: Bias in meta-analysis detected by a simple,  
17 graphical test. *BMJ* 1997; 315:629–634.
- 18 27. Deeks J, Higgins J, Altman D. Chapter 9: analysing data and undertaking meta-analyses. In:  
19 Higgins J, Green S editor(s). *Cochrane Handbook for Systematic Reviews of Interventions*.  
20 Chichester (UK): John Wiley & Sons, 2008.
- 21
- 22
- 23
- 24
- 25
- 26
- 27
- 28
- 29
- 30
- 31
- 32
- 33
- 34
- 35
- 36
- 37
- 38
- 39
- 40
- 41
- 42
- 43
- 44
- 45
- 46
- 47
- 48
- 49
- 50
- 51
- 52
- 53
- 54
- 55
- 56
- 57
- 58
- 59
- 60

**Appendices****Appendix 1. OVID MEDLINE search strategy**

1. randomized controlled trial. pt.
2. controlled clinical trial. pt.
3. randomized. ti, ab.
4. randomly. ti, ab.
5. trial. ti, ab.
6. groups. ti, ab.
7. or/1-6
8. exp acupuncture therapy, or acupuncture
9. acupressure. ti, ab.
10. (acupoint \$ or electroacupuncture or electro-acupuncture). ti, ab.
11. elongated needle \$. ti, ab.
12. (three edged needl \$ or three-edged needl). ti, ab.
13. (fire needling or warming needl). ti, ab.
14. auricular acupuncture. ti, ab.
15. pyonex. ti, ab.
16. moxibustion. ti, ab.
17. (pricking blood or bloodletting or blood-letting). ti, ab..
18. cupping. ti, ab.
19. Or/8-18
20. exp postherpetic neuralgia, or post-herpetic neuralgia
21. PHN. ti, ab.
22. herpes zoster. ti, ab.
23. shingles. ti, ab.
24. (neuralgia or postherpetic) . ti, ab.
25. herpes zoster. ti, ab.
26. Or/20-25
27. 7 and 19 and 26

This search strategy will be suitable for other electronic databases.

Appendix 2. Flow chart

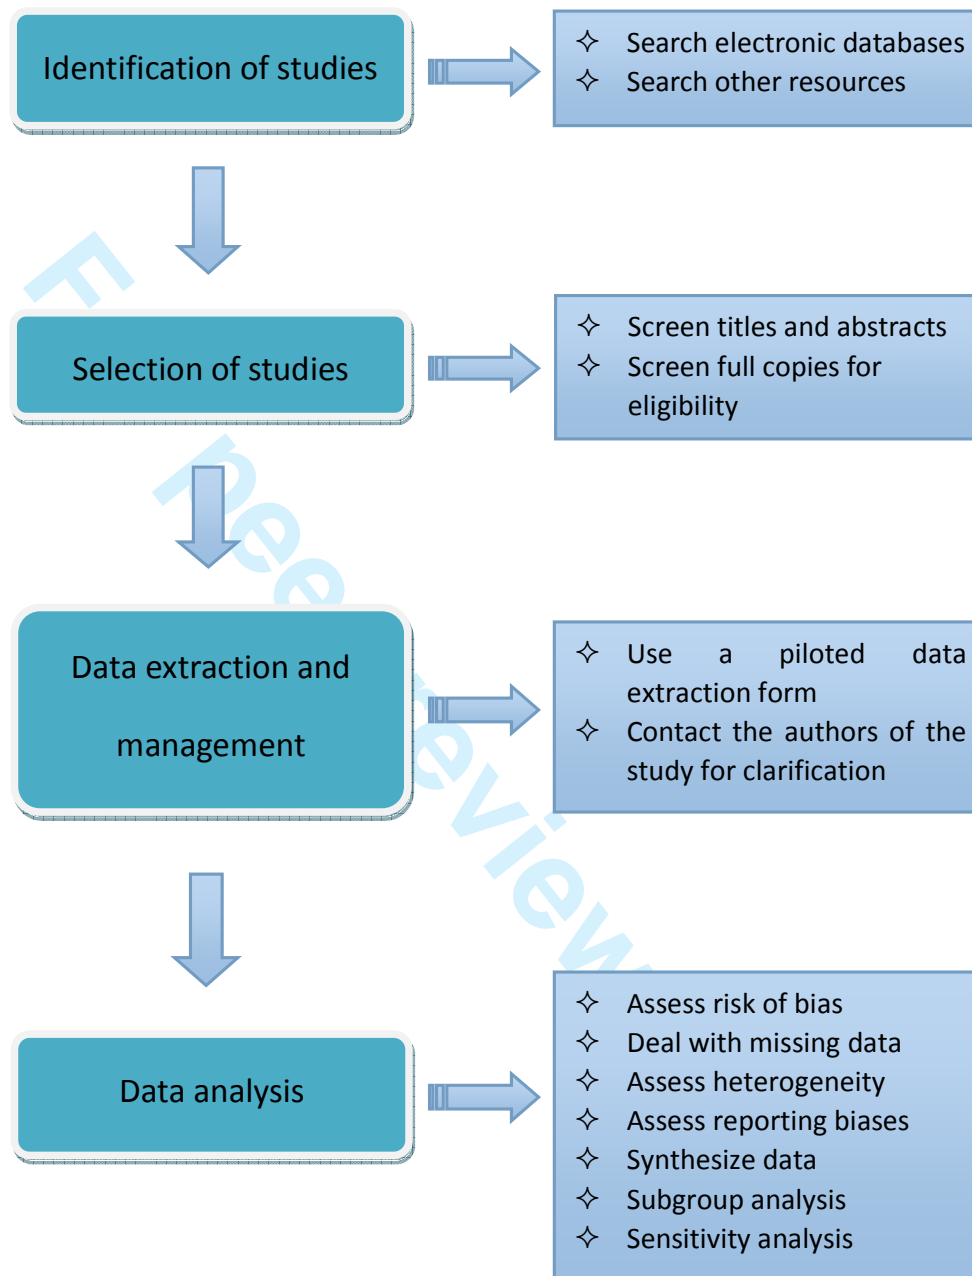

# BMJ Open

## Acupuncture for post-herpetic neuralgia: a systematic review protocol

|                                 |                                                                                                                                                                                                                                                                                                                                                   |
|---------------------------------|---------------------------------------------------------------------------------------------------------------------------------------------------------------------------------------------------------------------------------------------------------------------------------------------------------------------------------------------------|
| Journal:                        | <i>BMJ Open</i>                                                                                                                                                                                                                                                                                                                                   |
| Manuscript ID:                  | bmjopen-2014-005725.R1                                                                                                                                                                                                                                                                                                                            |
| Article Type:                   | Protocol                                                                                                                                                                                                                                                                                                                                          |
| Date Submitted by the Author:   | 03-Oct-2014                                                                                                                                                                                                                                                                                                                                       |
| Complete List of Authors:       | LI, Wang; Beijing University of Traditional Chinese Medicine, PENG, Weina; Guang'anmen Hospital, China Academy of Chinese Medical Sciences, Department of acupuncture<br>Zhou, Jing; Beijing University of Traditional Chinese Medicine, LIU, Zhishun; Guang'anmen Hospital, China Academy of Chinese Medical Sciences, Department of acupuncture |
| <b>Primary Subject Heading</b>: | Complementary medicine                                                                                                                                                                                                                                                                                                                            |
| Secondary Subject Heading:      | Evidence based practice, Medical publishing and peer review, Dermatology                                                                                                                                                                                                                                                                          |
| Keywords:                       | DERMATOLOGY, COMPLEMENTARY MEDICINE, Protocols & guidelines < HEALTH SERVICES ADMINISTRATION & MANAGEMENT, Neurological pain < NEUROLOGY, PAIN MANAGEMENT                                                                                                                                                                                         |
|                                 |                                                                                                                                                                                                                                                                                                                                                   |

SCHOLARONE™  
Manuscripts

1  
2  
3 **Acupuncture for post-herpetic neuralgia: a systematic review protocol**  
4

5 Wang LI<sup>1,2</sup>, Weina PENG<sup>1</sup>, Jing ZHOU<sup>1,2</sup>, Zhishun LIU<sup>1\*</sup>  
6  
7

8 1 Department of acupuncture, Guang'anmen Hospital, China Academy of Chinese Medical  
9 Sciences, Beijing (100053), China.  
10

11 2 Beijing University of Traditional Chinese Medicine, Beijing (100029), China.  
12

13 \*Correspondence to: Prof. Zhishun LIU; Tel: 86-10-88001124; E-mail: liuzhishun@aliyun.com  
14

15 Running Title: Acupuncture for post-herpetic neuralgia: a protocol  
16

17  
18 Keywords: acupuncture, postherpetic neuralgia, systematic review, protocol  
19

20  
21  
22 Word Count: 1880  
23  
24  
25  
26  
27  
28  
29  
30  
31  
32  
33  
34  
35  
36  
37  
38  
39  
40  
41  
42  
43  
44  
45  
46  
47  
48  
49  
50  
51  
52  
53  
54  
55  
56  
57  
58  
59  
60

## Abstract

**Introduction:** Post-herpetic neuralgia (PHN) is one of the most common complications following herpes zoster (HZ). The clinical trials indicate that acupuncture could reduce pain and discomfort among patients with PHN. This protocol aims to describe how to accumulate the current evidence on the efficacy and safety of acupuncture for treating PHN.

**Methods and Analysis:** This systematic review will electronically search multiple databases including the Cochrane Skin Group Trials Register, MEDLINE, EMBASE, the Cochrane Central Register of Controlled Trials (CENTRAL), Chinese Biomedical Literature Database (CBM), Chinese Medical Current Content (CMCC), and China National Knowledge Infrastructure (CNKI), and will hand search a list of medical journals as a supplement. Any clinical randomized controlled trials (RCTs) related to acupuncture for treating PHN will be included. Outcomes will include pain intensity, global impression, quality of life, safety and costs. Two reviewers will independently screen the titles, the abstracts or even full texts, and extract data, assess study quality. Meta-analysis will be conducted by pooling risk ratio for dichotomous data, standardized or weighted mean difference for continuous data.

**Ethics and dissemination:** This systematic review does not need ethical approval because there's no data used in our study linked to individual patient data. And the findings will be disseminated through peer-review publication or conference presentation.

**Trial registration:** PROSPERO registration number: CRD42014009555

## STRENGTHS AND LIMITATIONS OF THIS STUDY

This systematic review will be the potent one to assess the efficacy and safety of acupuncture for PHN. And it will provide a high-quality synthesis of current evidence for policy makers, patients, and clinicians seeking innovative and effective ways to treat PHN.

The ability to generate conclusions of high confidence in this study may be limited, due to the heterogeneity in the forms of acupuncture therapies and the qualities of methodology, and the impossibility of searching in all the electronic databases or other data sources.

## INTRODUCTION

Post-herpetic neuralgia (PHN) is a syndrome characterized by pain persisting more than 3 months following the resolution of herpes zoster (HZ) <sup>[1-4]</sup>. In addition, the clinical manifestations include allodynia, dysesthesia and pruritus along the distribution of the involved dermatome. The incidence of PHN is 4/1000 per year, which further increases to 12/1000 among people over 80 years old <sup>[5]</sup>. The relevant risk factors for PHN include old age, female gender, greater severity of acute pain, greater rash severity, the degree of sensory impairment, psychological distress, a painful prodrome, diabetes mellitus, nutritional deficiencies and diminished cell-mediated immunity <sup>[6-10]</sup>. However, the most relevant risk factor is old age <sup>[11-12]</sup>. It is uncommon for people under 50 years old, but approximately 83% of PHN occurring above <sup>[13]</sup>.

Due to the persisting or intermittent spontaneous pain, post-herpetic neuralgia brings a serious impact on the patients' daily activities (e.g. dressing, bathing, sleep), quality of life, general health, psychological health (e.g. depression and difficulty with concentration), and social and economic well-being <sup>[14-15]</sup>. Though the pathophysiology of PHN is poorly understood, postmortem studies in patients with PHN have found demyelination and axonal loss in both peripheral nerves and sensory roots <sup>[16]</sup>.

Because PHN frequently resolves spontaneously over time and the evaluation is unclear for the efficacy of the treatments <sup>[17-18]</sup>, pain reduction may be incorrectly attributed to current treatments for PHN. There are conventional treatments for PHN, such as tricyclic antidepressants (TCAs), antiepileptics, opioids, tramadol, lidocaine and capsaicin, which are probably effective to relieve some of the pain for a period of time. However, approximately 50% of patients still may not obtain satisfactory analgesia despite of treatments with these medications <sup>[4]</sup>. Moreover, being the first-line treatment suggested worldwide for PHN, TCAs and antiepileptics (gabapentin and pregabalin) still bring a high incidence of adverse events (AEs), including sedation, xerostomia, confusion, dysrhythmia, weight gain, dizziness, somnolence, fatigue and ataxia <sup>[18-21]</sup>.

Acupuncture, which has a history of more than 2000 years in both the prevention and treatment of diseases, plays an important role in Traditional Chinese Medicine (TCM). Kinds of acupuncture methods such as fire needling, electro-acupuncture, surrounding needling, pyonex, pricking blood and cupping are in use for the treatment of PHN in hospitals in China. In recent 5 years, acupuncture for treating PHN has been used in more than 137 studies. And benefit of the treatment group was reported between 84.1% and 97.5 % <sup>[22-24]</sup>. The clinical trials indicate that acupuncture could reduce pain and discomfort among most patients and remove pain and discomfort among some patients.

However, the efficacy and safety of acupuncture for PHN are lack of high-quality synthesis of current evidence. Thus, this systematic review is conducted to assess the efficacy and safety of acupuncture for PHN in pain-relieving and pain-removing.



## METHODS AND ANALYSIS

### Criteria for considering studies for this review

#### Type of studies

Randomized controlled trials (RCTs) will be included without restriction of language or publication type. Moreover, the trials using open label, single blind and double blind design will all be included, while cross-over designs and quasi- RCTs will be excluded.

#### Type of participants

The participants, who had been diagnosed as post-herpetic neuralgia defined as pain persisting over 3 months after resolution of the rash, will be all focused on. No restrictions on age, gender or race.

#### Types of interventions

Any form of acupuncture therapy used in experimental group will be included, involving acupuncture, electro-acupuncture, elongated needle, three-edged needle, fire needling, auricular acupuncture, pyonex, moxibustion, pricking blood, and cupping.

The control interventions with no treatment control, sham acupuncture control (non-point acupuncture, minimal acupuncture), placebo control and drug therapy control will be included.

Studies with the following comparisons will be included:

1. Acupuncture versus another therapy.
2. Acupuncture with another therapy versus the same other therapy.
3. Acupuncture versus no active intervention.
4. Acupuncture versus sham acupuncture.

#### Types of outcome measures

##### *Primary outcomes*

Pain intensity

Studies which applied scales such as Visual Analogue Scale (VAS), Numerical Rating Scale (NRS), Verbal Rating Scale (VRS), the Faces Pain Scale-Revised (FPS-R), etc. that were used to measure the intensity of pain will be included.

##### *Secondary outcomes*

1. Global impression (the proportion of participants whose symptoms improved after treatments)
2. Quality of life
3. Safety as measured by incidence and severity of adverse effects
4. Costs

#### Search methods for identification of studies

A search strategy will be designed and conducted according to the guidance of the Cochrane handbook <sup>[25]</sup>.

### Electronic searches

We will search the following databases:

1. the Cochrane Skin Group Trials Register(the inception to 2014.1)
2. MEDLINE(the inception to 2014.1)
3. EMBASE(the inception to 2014.1)
4. the Cochrane Central Register of Controlled Trials (CENTRAL) (the inception to 2014.1)
5. Chinese Biomedical Literature Database (CBM) (the inception to 2014.1)
6. Chinese Medical Current Content (CMCC) (the inception to 2014.1)
7. China National Knowledge Infrastructure (CNKI) (the inception to 2014.1)

This review will use the following search terms: postherpetic neuralgia, PHN, herpes zoster, shingles and acupuncture, electro-acupuncture, elongated needle, fire needling, auricular acupuncture, pyonex, moxibustion, pricking blood, three-edged needle, cupping. This study will adapt this strategy to search all the above databases.

There will be no restriction on language or publication type. The search strategy for MEDLINE can be found in Appendix 1.

### Searching other resources

A list of medical journals in university libraries will be searched as a supplement, such as Chinese Acupuncture & Moxibustion(1981-2014.1), Journal of Clinical Acupuncture & Moxibustion(1985-2014.1), Shanghai Journal of Acupuncture& Moxibustion(1982-2014.1) and Acupuncture Research(1976-2014.1).

### Data collection and analysis

#### Selection of studies

A procedure for screening will be discussed and developed before the start of selection. Both the electronically searched outputs and the studies obtained from other sources will be cited in a database created by NoteExpress software. Two reviewers (LW and ZJ) will independently screen all the titles and abstracts of studies to find out the duplicates, as well as to review the studies and decide whether they will be included according to the predefined inclusion criteria. If there are studies that could not be clearly included based on both titles and abstracts, full copies will be screened. Once any disagreement occurs, it will be resolved through discussion and resolved by reaching a consensus among the two reviewers (LW and ZJ), or consult of a third arbitrator (LZS). In addition, the kappa value calculated by  $(P \text{ observed} - P \text{ chance}) / (1 - P \text{ chance})$ , will be used to calculate the consistency evaluation between reviewers.

#### Data extraction and management

Data extractors (LW and ZJ) will independently extract data from the included trials by using a piloted data extraction form which is discussed and developed by all the reviewers. The extracted data will include data for trails, participants, interventions, outcomes and miscellaneous items such as funding sources and ethical approval. Any disagreement in data extraction will be resolved by discussion or consult of a third arbitrator (LZS). If data presented in

1  
2  
3 studies is unclear, missing, or presented in a form that is either un-extractable or difficult to  
4 reliably extract, the authors of the study will be contacted for clarification.  
5  
6

#### 7 **Assessment of risk of bias in included studies**

8 According to the Cochrane Handbook of Systematic Reviews of Interventions <sup>[25]</sup>, the reviewers  
9 will firstly access six domains of each trial (sequence generation, allocation concealment, blinding,  
10 incomplete outcome data, selective outcome reporting and 'other issues'), then summarize the  
11 assessments, and at last categorize the included trials into 3 levels of bias: low, unclear and high  
12 risk of bias. The risk of bias will be assessed independently. Any disagreements will be resolved  
13 by discussion or consult of a third arbitrator.  
14  
15

#### 16 **Measures of treatment effect**

17 Where continuous scales of measurement are used to assess the effects of treatment, the  
18 weighted mean difference (WMD) with 95% confidence intervals (CI) will be used, or the  
19 standardized mean difference (SMD) with 95%CI if different measurement tools and units have  
20 been used. For dichotomous outcomes results will be expressed as the relative risk (RR) with  
21 95%CI.  
22  
23

#### 24 **Unit of analysis issues**

25 Studies with multiple intervention groups will be included. Each intervention group will be  
26 compared to the single control group.  
27  
28

#### 29 **Dealing with missing data**

30 The authors of the included studies will be contacted to get further information if there are any  
31 missing or insufficient data from the trials. And relevant data obtained in this manner will be  
32 included in the review. The intent-to-treat (ITT) principle (available case analysis and full  
33 intent-to-treat analysis) will be applied for statistical analysis, without getting the missing data.  
34  
35  
36

#### 37 **Assessment of heterogeneity**

38 Heterogeneity will be investigated by the  $I^2$  statistic ( $I^2$  to or more than 50% was considered  
39 indicative of heterogeneity) and the chi-squared ( $\chi^2$ , or  $Chi^2$ ) test <sup>[25]</sup>. The  $Chi^2$  test will use an  
40 alpha of 0.1 for statistical significance and the P-value to be less than 0.1 will be accepted as  
41 heterogeneity.  
42  
43  
44

#### 45 **Assessment of reporting biases**

46 Funnel plots will be used to assess reporting biases, if ten or more studies are included in a  
47 meta-analysis. Such a funnel plot asymmetry could be caused by publication or related biases, or  
48 by systematic differences between small and large studies. If a relationship is identified, the  
49 clinical diversity of the studies will be further examined as a possible explanation and described  
50 in the text. However, because graphical evaluation can be subjective, Egger's method will also be  
51 used to assess the reporting biases <sup>[26]</sup>.  
52  
53  
54

#### 55 **Data synthesis**

56 The Revman 5.1 software will be used to conduct Meta analysis and calculate the RR with 95%CI  
57  
58  
59  
60

1  
2  
3 for the dichotomous data, the WMD or the SMD with 95%CI for continuous data during synthesis.  
4 If the same outcome measurement tool and unit is used, the WMD with 95%CI will be calculated,  
5 or SMD with 95%CI instead. If the included studies exist heterogeneity, the P value is less than  
6 0.1, the RR, the WMD, or the SMD will be calculated by the random effects model. Otherwise, it  
7 will be calculated by a fixed effect model.  
8  
9

### 10 **Subgroup analysis**

11 Subgroup analysis will be performed based on different controls, interventions, durations of  
12 treatment, and outcome measures. Adverse effects will be tabulated and assessed with  
13 descriptive techniques.  
14  
15

### 16 **Sensitivity analysis**

17 For the sensitivity analysis, the meta-analysis will repeat, substituting decisions alternatively to  
18 test the robustness of the primary decisions of the review process<sup>[27]</sup>. The decision nodes are  
19 principally the methodological qualities, the sample size and the option of using missing data  
20 (available case analysis and full intent-to-treat analysis).  
21  
22  
23

## 24 **DISCUSSION**

25 PHN brings a significant adverse impact on patients' daily activities, quality of life, general health,  
26 psychological health, and social and economic well-being. Acupuncture therapy is a suggested  
27 intervention in China that may have value to treat PHN, but no high-quality synthesis of the  
28 evidence exists. Thus, a high-quality systematic review is needed and the process of performing  
29 this study can be found in figure 1 which will be separated into four parts: identification,  
30 selection, data extraction and management, and data analysis.  
31  
32  
33

34 This study might have kind of limitations that may limit its ability to generate conclusions based  
35 on high confidence. Specifically, there may be significant heterogeneity in the forms of  
36 acupuncture therapies used and the qualities of methodology. There will also likely be  
37 differences in outcomes measured and tools used. Inherent uncertainty exists by pooling this  
38 data within constructed domains.  
39  
40  
41

42 This review has not searched studies in more electronic databases or a grey list, which could limit  
43 the broad search of RCTs to generate the findings.  
44  
45  
46  
47  
48  
49  
50  
51  
52  
53  
54  
55  
56  
57  
58  
59  
60

1  
2  
3  
4 **Authors' contributions:** Wang LI and Zhishun LIU contributed to the conception of the study. The manuscript of  
5 the protocol was drafted by Wang LI, and was revised by Weina PENG. The search strategy was developed by all  
6 authors and run by Wang LI and Jing ZHOU, who will also independently screen the potential studies, extract data  
7 of included studies, assess the risk of bias and finish data synthesis. Zhishun LIU will arbitrate the disagreements  
8 and ensure that no errors occur during the study. All authors approved for the publication of the protocol.  
9  
10

11  
12 **Funding statement:** This research received no specific grant from any funding agency in the public, commercial  
13 or not-for-profit sectors.  
14

15  
16  
17 **Competing interests:** No competing interests exist.  
18

19 **Figure1. Flow chart of the systematic review**  
20  
21  
22  
23  
24  
25  
26  
27  
28  
29  
30  
31  
32  
33  
34  
35  
36  
37  
38  
39  
40  
41  
42  
43  
44  
45  
46  
47  
48  
49  
50  
51  
52  
53  
54  
55  
56  
57  
58  
59  
60

## REFERENCES

1. Johnson RW: The future of predictors, prevention, and therapy in postherpetic neuralgia. *Neurology* 1995; 45(12 Suppl 8):S70-72.
2. Katz J, Cooper EM, Walther RR, Sweeney EW, Dworkin RH: Acute pain in herpes zoster and its impact on health-related quality of life. *Clin Infect Dis* 2004;39(3):342-348.
3. Hope-Simpson RE: The Nature of Herpes Zoster: a Long-Term Study and a New Hypothesis. *Proc R Soc Med* 1965;58:9-20.
4. Goßrau G. Postzosterneuralgie. *Schmerz*. 2014;28: 93-104.
5. Merskey HH, Bogduk N. Classification of Chronic Pain: Descriptions of Chronic Pain Syndrome and Definitions of Pain Terms. 2nd ed. Seattle, WA: IASP Press; 2012:212–213.
6. ZHANG Dongli, HE Li. Risk factors and preventive measures of postherpetic neuralgia. *Chinese rehabilitation medicine*. 2005;9(37):118-119.
7. Ducic, Ivica; Felder, John Matthew. Peripheral Nerve Surgery for the Treatment of Postherpetic neuralgia. *Annals of Plastic Surgery*, October 2013;71(4):384-385 *Peripheral Nerve Surgery and Research*
8. Chen JY, Chang CY, Feng PH, Chu CC, So EC, Hu ML. Plasma vitamin C is lower in postherpetic neuralgia patients and administration of vitamin C reduces spontaneous pain but not brush-evoked pain. *Clin J Pain*. 2009;25:562–569.
9. Chen JY, Chu CC, Lin YS, Cheng So E, Shieh JP, Hu ML. Nutrient deficiencies as a risk factor in Taiwanese patients with postherpetic neuralgia. *Br J Nutr*. 2011 Apr;8: 1–9.
10. Dworkin RH, Schmader KE. The epidemiology and natural history of herpes zoster and postherpetic neuralgia. In: Watson CPN, ed. *Herpes zoster and postherpetic neuralgia*, 2nd ed. Amsterdam: Elsevier; 2001:39–65.
11. Donahue JG, Choo PW, Manson JE, Platt R: The incidence of herpes zoster. *Arch Intern Med* 1995; 155(15):1605-1609.
12. Yawn BP, Saddier P, Wollan PC, St Sauver JL, Kurland MJ, Sy LS: A population-based study of the incidence and complication rates of herpes zoster before zoster vaccine introduction. *Mayo Clin Proc* 2007; 82(11):1341-1349.
13. Yawn BP, Saddier P, Wollan PC, et al. A population-based study of the incidence and complication rates of herpes zoster before zoster vaccine introduction. *Mayo Clin Proc* 2007;82: 1341-1349.
14. Kenneth E. Schmader, M.D. Epidemiology and Impact on Quality of Life of Postherpetic Neuralgia and Painful Diabetic Neuropathy. *The Clinical Journal of Pain*. 2002;18:350–354
15. NICE. NICE clinical guideline 96. Neuropathic pain: the pharmacological management of neuropathic pain in adults in non-specialist settings. National Institute for Health and Clinical Excellence. <http://www.nice.org.uk/guidance/CG96> (accessed 5 June 2010).
16. Decroix J, Partsch H, Gonzalez R, et al. Factors influencing pain outcome in herpes zoster: an observational study with valaciclovir. *J Eur Acad Dermatol Venereol* 2000; 14: 23-33
17. Panlilio LM, Christo PJ, Raja SN. Current management of postherpetic neuralgia. *Neurologist* 2002; 8 (6): 339-350
18. Paul J. Christo, Greg Hobelmann, David N. Maine. Post-Herpetic Neuralgia in Older Adults. *Drugs Aging* 2007; 24 (1): 1-19
19. Rowbotham M, Harden N, Stacey B, Bernstein P, Magnus-Miller L. Gabapentin for the treatment of postherpetic neuralgia: a randomized controlled trial. *JAMA* 1998;280: 1837-1842.

- 1  
2  
3 20. Rice AS, Maton S, Postherpetic Neuralgia StudyGroup. Gabapentin in postherpetic neuralgia:  
4 a randomised, double blind, placebo controlled study. *Pain* 2001; 94:215-224.  
5  
6 21. Van Marwijk HWJ, Bijl D, Adegrove HJ, et al. Antidepressant prescription for depression in  
7 general practice in the Netherlands. *Pharm World Sci* 2001; 23(2): 46-49  
8  
9 22. Gong Jing. Treatment of 40 Cases of post-herpetic neuralgia with Bloodletting and cupping.  
10 *Guide of China Medicine*.2013 July;11(20):292-293  
11  
12 23. Zhao Ruiqin. Treatment of 40 Cases of post-herpetic neuralgia with Bloodletting. *Shanxi*  
13 *Journal of TCM*.2011;32(5):595-597  
14  
15 24. Fang Xiaoyu, Han Limin, Wu Hongyu. Therapeutic Effect Observation on the treatment of  
16 post-herpetic neuralgia with electroacupuncture. *People's military medical*.2013;12:1427-1428  
17  
18 25. JPT CHH, Green S. Cochrane handbook for systematic reviews of interventions version 5.1.  
19 0[updated March 2011]. The Cochrane Collaboration 2011  
20  
21 26. Egger M, Davey Smith G, Schneider M, et al. Bias in meta-analysis detected by a simple,  
22 graphical test. *BMJ* 1997; 315:629-634.  
23  
24 27. Deeks J, Higgins J, Altman D. Chapter 9: analysing data and undertaking meta-analyses. In:  
25 Higgins J, Green S editor(s). *Cochrane Handbook for Systematic Reviews of Interventions*.  
26 Chichester (UK): John Wiley & Sons, 2008.  
27  
28  
29  
30  
31  
32  
33  
34  
35  
36  
37  
38  
39  
40  
41  
42  
43  
44  
45  
46  
47  
48  
49  
50  
51  
52  
53  
54  
55  
56  
57  
58  
59  
60

## Acupuncture for post-herpetic neuralgia: a systematic review protocol

Wang LI<sup>1,2</sup>, Weina PENG<sup>1</sup>, Jing ZHOU<sup>1,2</sup>, Zhishun LIU<sup>1\*</sup>

1 Department of acupuncture, Guang'anmen Hospital, China Academy of Chinese Medical Sciences, Beijing (100053), China.

2 Beijing University of Traditional Chinese Medicine, Beijing (100029), China.

\*Correspondence to: Prof. Zhishun LIU; Tel: 86-10-88001124; E-mail: liuzhishun@aliyun.com

Running Title: Acupuncture for post-herpetic neuralgia: a protocol

Keywords: acupuncture, postherpetic neuralgia, systematic review, protocol, ~~randomized controlled trials~~

Word Count: 1880

### Abstract

**Background:** Post-herpetic neuralgia (PHN) is a syndrome characterized by pain persisting more than 3 months following the resolution of herpes zoster (HZ). PHN frequently resolves spontaneously over time and the efficacy of the treatments for PHN is evaluated unclearly. Acupuncture has a history of over 2000 years in both the prevention and treatment of diseases. In recent 5 years, acupuncture for treating PHN has been used in more than 137 studies, and benefit of the treatment group was reported between 84.1% and 97.5%. The objective of this systematic review is to assess the efficacy and safety of acupuncture for PHN in pain relieving and pain removing. **Introduction:** Post-herpetic neuralgia (PHN) is one of the most common complications following herpes zoster (HZ). The clinical trials indicate that acupuncture could reduce pain and discomfort among patients with PHN. This protocol aims to describe how to accumulate the current evidence on the efficacy and safety of acupuncture for treating PHN. **Methods/design and Analysis:** This systematic review will electronically search multiple databases and hand search a list of medical journals, and will contact authors to identify unclear information. Two reviewers will independently screen the titles, the abstracts or even full texts and extract data. Primary outcome is pain intensity measured by Visual Analogue Scale (VAS), etc., and secondary outcomes are global impression, quality of life, safety measured by incidence and severity of adverse effects and costs. Meta-analysis will be conducted by pooling risk ratio for dichotomous data, standardized or weighted mean difference for continuous data. This systematic review will electronically search multiple databases including the Cochrane Skin Group Trials Register, MEDLINE, EMBASE, the Cochrane Central Register of Controlled Trials (CENTRAL), Chinese Biomedical Literature Database (CBM), Chinese Medical Current Content (CMCC), and China National Knowledge Infrastructure (CNKI), and will hand search a list of medical journals as a supplement. Any clinical randomized controlled trails (RCTs) related to acupuncture for treating PHN will be included. Outcomes will include pain intensity, global impression, quality of life, safety and costs. Two reviewers will independently screen the titles, the abstracts or even full texts, and extract data, access study quality. Meta-analysis will be conducted by pooling risk ratio for dichotomous data, standardized or weighted mean difference for continuous data. **Conclusion:** This review will accumulate the current evidence on the efficacy and safety of



1  
2  
3  
4  
5  
6 acupuncture for PHN. Furthermore, it will benefit policy makers, patients, and clinicians seeking  
7 innovative and effective ways to achieve pain relief and removal for PHN.

8 **Ethics and Dissemination:** [This systematic review does not need ethical approval because](#)  
9 [there's no data used in our study linked to individual patient data. And ~~This study~~the findings](#) will  
10 be disseminated through peer-review publication or conference presentation.

11 **Trial registration:** PROSPERO registration number: CRD42014009555

12 **Keywords:** [acupuncture, postherpetic neuralgia, systematic review, protocol, randomized](#)  
13 [controlled trials](#)

#### 14 15 16 **STRENGTHS AND LIMITATIONS OF THIS STUDY**

17 This systematic review will be the [first](#)potent one to assess the efficacy and safety of  
18 acupuncture for PHN. And it will provide a high-quality synthesis of current evidence for policy  
19 makers, patients, and clinicians seeking innovative and effective ways to treat PHN.

20  
21 The ability to generate conclusions of high confidence in this study may be limited,  
22 due to the heterogeneity in the forms of acupuncture therapies and the qualities of methodology,  
23 and the impossibility of searching in all the electronic databases or other data sources.

#### 24 25 26 27 **Background**INTRODUCTION

28 Post-herpetic neuralgia (PHN) is a syndrome characterized by pain persisting more than 3  
29 months following the resolution of herpes zoster (HZ) <sup>[1-4]</sup>. In addition, the clinical  
30 [manifestations](#)manifestations include allodynia, dysesthesia and pruritus along the distribution of  
31 the involved dermatome. The incidence of PHN is 4/1000 per year, which further increases to  
32 12/1000 among people over 80 years old <sup>[5]</sup>. The relevant risk factors for PHN include old age,  
33 female gender, greater severity of acute pain, greater rash severity, the degree of sensory  
34 impairment, psychological distress, a painful prodrome, diabetes mellitus, nutritional deficiencies  
35 and diminished cell-mediated immunity <sup>[6-10]</sup>. However, the most relevant risk factor is old age  
36 <sup>[11-12]</sup>. It is uncommon for people under 50 years old, but approximately 83% of PHN occurring  
37 above <sup>[13]</sup>.

38  
39 Due to the persisting or intermittent spontaneous pain, post-herpetic neuralgia brings a serious  
40 impact on the patients' daily activities (e.g. dressing, bathing, sleep), quality of life, general  
41 health, psychological health (e.g. depression and difficulty with concentration), and social and  
42 economic well-being <sup>[14-15]</sup>. Though the pathophysiology of PHN is poorly understood,  
43 postmortem studies in patients with PHN have found demyelination and axonal loss [in](#) both  
44 peripheral nerves and sensory roots <sup>[16]</sup>.

45  
46 Because PHN frequently resolves spontaneously over time and [the evaluation is unclear for](#) the  
47 efficacy of the treatments [for PHN is evaluated unclearly](#) <sup>[17-18]</sup>, pain reduction may be incorrectly  
48 attributed to current treatments for PHN. There are conventional treatments for PHN, such as  
49 tricyclic antidepressants (TCAs), antiepileptics, opioids, tramadol, lidocaine and capsaicin, which  
50 are probably effective to relieve some of the pain for a period of time. However, approximately  
51 50% of patients [still](#) may not obtain satisfactory analgesia despite [of](#) treatments with these  
52  
53  
54  
55  
56  
57  
58  
59  
60

1  
2  
3  
4  
5  
6 medications<sup>[4]</sup>. Moreover, being the first-line treatment suggested worldwide for PHN, TCAs and  
7 antiepileptics (gabapentin and pregabalin) still bring a high incidence of adverse events (AEs),  
8 including sedation, xerostomia, confusion, dysrhythmia, weight gain, dizziness, somnolence,  
9 fatigue and ataxia<sup>[18-21]</sup>.

11  
12 Acupuncture, which has a history of more than 2000 years in both the prevention and treatment  
13 of diseases, plays an important role in Traditional Chinese Medicine (TCM). Kinds of acupuncture  
14 methods such as fire needling, electro-acupuncture, surrounding needling, pyonex, pricking  
15 blood and cupping are in use for the treatment of PHN in hospitals in China. [In recent 5 years,](#)  
16 [acupuncture for treating PHN has been used in more than 137 studies.](#) ~~Preliminary searches for~~  
17 ~~recent 5 years have revealed more than 137 studies of acupuncture for treating PHN.~~ And benefit  
18 of the treatment group was reported between 84.1% and 97.5%<sup>[22-24]</sup>. The clinical trials indicate  
19 that acupuncture could reduce pain and discomfort among most patients and remove pain and  
20 discomfort among some patients.  
21

22  
23 However, the efficacy and safety of acupuncture for PHN ~~have not been systematically~~  
24 ~~reviewed~~ [are lack of high-quality synthesis of current evidence](#). Thus, this systematic review is  
25 conducted to assess the efficacy and safety of acupuncture for PHN in pain-relieving and  
26 pain-removing.  
27

## 28 **METHODS AND ANALYSIS**

### 29 **Criteria for considering studies for this review**

#### 30 **Type of studies**

31  
32 Randomized controlled trials (RCTs) will be included without restriction of language or  
33 publication type. Moreover, the trials using open label, single blind and double blind design will  
34 all be included, while cross-over designs and quasi- RCTs will be excluded.  
35

#### 36 **Type of participants**

37  
38 The participants, who had been diagnosed as post-herpetic neuralgia defined as pain persisting  
39 over 3 months after resolution of the rash, will be all focused on. No restrictions on age, gender  
40 or race.  
41

#### 42 **Types of interventions**

43  
44 Any form of acupuncture therapy used in experimental group will be included, involving  
45 acupuncture, electro-acupuncture, elongated needle, three-edged needle, fire needling,  
46 auricular acupuncture, pyonex, moxibustion, pricking blood, and cupping.  
47

48  
49 The control interventions with no treatment control, sham acupuncture control (non-point  
50 acupuncture, minimal acupuncture), placebo control and drug therapy control will be included.  
51

52  
53 Studies with the following comparisons will be included:

- 54 1. Acupuncture versus another therapy.
  - 55 2. Acupuncture with another therapy versus the same other therapy.
  - 56 3. [Acupuncture versus no active intervention.](#)
- 57  
58  
59  
60

#### [4. Acupuncture versus sham acupuncture.](#)

##### **Types of outcome measures**

###### *Primary outcomes*

Pain intensity

~~1-~~ [as measured by](#) [Studies which applied scales such as](#) Visual Analogue Scale (VAS), Numerical Rating Scale (NRS), Verbal Rating Scale (VRS), the Faces Pain Scale-Revised (FPS-R), etc. [that were used to measure the intensity of pain will be included.](#)

###### *Secondary outcomes*

1. Global impression [\(the proportion of participants whose symptoms improved after treatments\)](#)
2. Quality of life
3. Safety as measured by incidence and severity of adverse effects
4. Costs

##### **Search methods for identification of studies**

A search strategy will be designed and conducted according to the guidance of the Cochrane handbook <sup>[25]</sup>.

##### **Electronic searches**

We will search the following databases:

1. the Cochrane Skin Group Trials Register(the inception to 2014.1)
2. MEDLINE(the inception to 2014.1)
3. EMBASE(the inception to 2014.1)
4. the Cochrane Central Register of Controlled Trials (CENTRAL) (the inception to 2014.1)
5. Chinese Biomedical Literature Database (CBM) (the inception to 2014.1)
6. Chinese Medical Current Content (CMCC) (the inception to 2014.1)
7. China National Knowledge Infrastructure (CNKI) (the inception to 2014.1)

This review will use the following search terms: postherpetic neuralgia, PHN, herpes zoster, shingles and acupuncture, electro-acupuncture, elongated needle, fire needling, auricular acupuncture, pyonex, moxibustion, pricking blood, three-edged needle, cupping. This study will adapt this strategy to search all the above databases.

There will be no restriction on language or publication type. The search strategy for MEDLINE can be found in Appendix 1.

##### **Searching other resources**

~~Hand search a~~ [A](#) list of medical journals in university libraries [will be searched as a supplement,](#) such as Chinese Acupuncture & Moxibustion(1981-2014.1), Journal of Clinical Acupuncture & Moxibustion(1985-2014.1), Shanghai Journal of Acupuncture& Moxibustion(1982-2014.1) and Acupuncture Research(1976-2014.1).

Formatted: No bullets or numbering

## Data collection and analysis

### Selection of studies

A procedure for screening will be discussed and developed before the start of selection. Both the ~~outputs searched~~ electronically [searched outputs](#) and the studies obtained from other sources will be cited in a database created by NoteExpress software. Two reviewers (LW and ZJ) will independently screen all the titles and abstracts of studies to find out the duplicates, as well as to review the studies and decide whether they will be included according to the predefined inclusion criteria. If there are studies that could not be clearly included based on both titles and abstracts, full copies will be screened. Once any disagreement occurs, it will be resolved through discussion and resolved by reaching a consensus among the two reviewers (LW and ZJ), or consult of a third arbitrator (LZS). In addition, the kappa value [calculated by  \$\(P \text{ observed} - P \text{ chance}\) / \(1 - P \text{ chance}\)\$](#) , will be used to calculate the consistency evaluation between reviewers.

### Data extraction and management

Data extractors (LW and ZJ) will independently extract data from the included trials by using a piloted data extraction form which is discussed and developed by all the reviewers. The extracted data will include data for trails, participants, interventions, outcomes and miscellaneous items such as funding sources and ethical approval. Any disagreement in data extraction will be resolved by discussion or consult of a third arbitrator (LZS). If data presented in studies is unclear, missing, or presented in a form that is either un-extractable or difficult to reliably extract, the authors of the study will be contacted for clarification.

### Assessment of risk of bias in included studies

According to the Cochrane Handbook of Systematic Reviews of Interventions <sup>[25]</sup>, the reviewers will firstly access six domains of each trial (sequence generation, allocation concealment, blinding, incomplete outcome data, selective outcome reporting and 'other issues'), then summarize the assessments, and at last categorize the included trials into 3 levels of bias: low, unclear and high risk of bias. The risk of bias will be assessed independently. Any disagreements will be resolved by discussion or consult of a third arbitrator.

### Measures of treatment effect

Where continuous scales of measurement are used to assess the effects of treatment, the weighted mean difference (WMD) with 95% confidence intervals (CI) will be used, or the standardized mean difference (SMD) with 95%CI if different measurement tools and units have been used. For dichotomous outcomes results will be expressed as the relative risk (RR) with 95%CI.

### Unit of analysis issues

Studies with multiple intervention groups will be included. Each intervention group will be compared to the single control group.

### Dealing with missing data

The authors of the included studies will be contacted to get further information if there are any

1  
2  
3  
4  
5  
6 missing or insufficient data from the trials. And relevant data obtained in this manner will be  
7 included in the review. The intent-to-treat (ITT) principle (available case analysis and full  
8 intent-to-treat analysis) will be applied for statistical analysis, without getting the missing data.  
9

#### 10 **Assessment of heterogeneity**

11 Heterogeneity will be investigated by the  $I^2$  statistic ( $I^2$  to or more than 50% was considered  
12 indicative of heterogeneity) and the chi-squared ( $\chi^2$ , or  $Chi^2$ ) test <sup>[25]</sup>. The  $Chi^2$  test will use an  
13 alpha of 0.1 for statistical significance and the P-value to be less than 0.1 will be accepted as  
14 heterogeneity.  
15

#### 16 **Assessment of reporting biases**

17 Funnel plots will be used to assess reporting biases, if ten or more studies are included in a  
18 meta-analysis. Such a funnel plot asymmetry could be caused by publication or related biases, or  
19 by systematic differences between small and large studies. If a relationship is identified, the  
20 clinical diversity of the studies will be further examined as a possible explanation and described  
21 in the text. However, because graphical evaluation can be subjective, Egger's method will also be  
22 used to assess the reporting biases <sup>[26]</sup>.  
23  
24  
25

#### 26 **Data synthesis**

27 The Revman 5.1 software will be used to conduct Meta analysis and calculate the RR with 95%CI  
28 for the dichotomous data, the WMD or the SMD with 95%CI for continuous data during synthesis.  
29 If the same outcome measurement tool and unit is used, the WMD with 95%CI will be calculated,  
30 or SMD with 95%CI instead. If the included studies exist heterogeneity, the P value is less than  
31 0.1, the RR, the WMD, or the SMD will be calculated by the random effects model. Otherwise, it  
32 will be calculated by a fixed effect model.  
33  
34

#### 35 **Subgroup analysis**

36 Subgroup analysis will be performed based on different controls, interventions, durations of  
37 treatment, and outcome measures. Adverse effects will be tabulated and assessed with  
38 descriptive techniques.  
39

#### 40 **Sensitivity analysis**

41 For the sensitivity analysis, the meta-analysis will repeat, substituting decisions alternatively to  
42 test the robustness of the primary decisions of the review process <sup>[27]</sup>. The decision nodes are  
43 principally the methodological qualities, the sample size and the option of using missing data  
44 (available case analysis and full intent-to-treat analysis).  
45  
46

#### 47 **Discussion DISCUSSION**

48 PHN brings a significant adverse impact on patients' daily activities, quality of life, general health,  
49 psychological health, and social and economic well-being. Acupuncture therapy is a suggested  
50 intervention in China that may have value to treat PHN, but no high-quality synthesis of the  
51 evidence exists. [Thus, a high-quality systematic review is needed and the process of performing  
52 this study can be found in figure 1 which will be separated into four parts: identification,  
53 selection, data extraction and management, and data analysis.](#)  
54  
55  
56  
57  
58  
59  
60

1  
2  
3  
4  
5  
6  
7 This study might have kind of limitations that may limit its ability to generate conclusions based  
8 on high confidence. Specifically, there may be significant heterogeneity in the forms of  
9 acupuncture therapies used and the qualities of methodology. There will also likely be  
10 differences in outcomes measured and tools used. Inherent uncertainty exists by pooling this  
11 data within constructed domains.  
12

13  
14 This review has not searched studies in more electronic databases or a grey list, which could limit  
15 the broad search of RCTs to generate the findings.  
16

### 17 **Conclusion**

18 ~~This systematic review will accumulate the current evidence on the efficacy and safety of~~  
19 ~~acupuncture for PHN. And it will benefit policy makers, patients, and clinicians seeking innovative~~  
20 ~~and effective ways to achieve pain relief and removal for PHN.~~  
21

22  
23 **Authors' contributions:** Wang LI and Zhishun LIU contributed to the conception of the study. The manuscript of  
24 the protocol was drafted by Wang LI, and was revised by Weina PENG. The search strategy was developed by all  
25 authors and run by Wang LI and Jing ZHOU, who will also independently screen the potential studies, extract data  
26 of included studies, assess the risk of bias and finish data synthesis. Zhishun LIU will arbitrate the disagreements  
27 and ensure that no errors occur during the study. All authors approved for the publication of the protocol.  
28

29  
30 **Funding statement:** This research received no specific grant from any funding agency in the public, commercial  
31 or not-for-profit sectors.  
32

33  
34 **Competing interests:** No competing interests exist.  
35

36  
37 ~~Ethical approval: This research does not need ethical approval because data we used will not be linked to~~  
38 ~~individual data and privacy.~~  
39

### 40 **Reference** **REFERENCES**

- 41  
42 1. Johnson RW: The future of predictors, prevention, and therapy in postherpetic neuralgia.  
43 Neurology 1995; 45(12 Suppl 8):S70-72.  
44 2. Katz J, Cooper EM, Walther RR, Sweeney EW, Dworkin RH: Acute pain in herpes zoster and its  
45 impact on health-related quality of life. Clin Infect Dis 2004;39(3):342-348.  
46 3. Hope-Simpson RE: The Nature of Herpes Zoster: a Long-Term Study and a New Hypothesis.  
47 Proc R Soc Med 1965;58:9-20.  
48 4. Goßrau G. Postzosterneuralgie. Schmerz. 2014;28: 93-104.  
49 5. Merskey HH, Bogduk N. Classification of Chronic Pain: Descriptions of Chronic Pain Syndrome  
50 sand Definitions of Pain Terms. 2nd ed. Seattle, WA: IASP Press; 2012: 212-213.  
51 6. ZHANG Dongli, HE Li. Risk factors and preventive measures of postherpetic neuralgia. Chinese  
52 rehabilitation medicine. 2005;9(37):118-119.  
53 7. Ducic, Ivica; Felder, John Matthew. Peripheral Nerve Surgery for the Treatment of Postherpetic  
54  
55  
56  
57  
58  
59  
60

- 1  
2  
3  
4  
5  
6  
7  
8  
9  
10  
11  
12  
13  
14  
15  
16  
17  
18  
19  
20  
21  
22  
23  
24  
25  
26  
27  
28  
29  
30  
31  
32  
33  
34  
35  
36  
37  
38  
39  
40  
41  
42  
43  
44  
45  
46  
47  
48  
49  
50  
51  
52  
53  
54  
55  
56  
57  
58  
59  
60
- neuralgia. *Annals of Plastic Surgery*, October 2013;71(4):384-385 Peripheral Nerve Surgery and Research
8. Chen JY, Chang CY, Feng PH, Chu CC, So EC, Hu ML. Plasma vitamin C is lower in postherpetic neuralgia patients and administration of vitamin C reduces spontaneous pain but not brush-evoked pain. *Clin J Pain*. 2009;25:562–569.
9. Chen JY, Chu CC, Lin YS, Cheng So E, Shieh JP, Hu ML. Nutrient deficiencies as a risk factor in Taiwanese patients with postherpetic neuralgia. *Br J Nutr*. 2011 Apr;8: 1–9.
10. Dworkin RH, Schmader KE. The epidemiology and natural history of herpes zoster and postherpetic neuralgia. In: Watson CPN, ed. *Herpes zoster and postherpetic neuralgia*, 2nd ed. Amsterdam: Elsevier; 2001:39–65.
11. Donahue JG, Choo PW, Manson JE, Platt R: The incidence of herpes zoster. *Arch Intern Med* 1995; 155(15):1605-1609.
12. Yawn BP, Saddier P, Wollan PC, St Sauver JL, Kurland MJ, Sy LS: A population-based study of the incidence and complication rates of herpes zoster before zoster vaccine introduction. *Mayo Clin Proc* 2007; 82(11):1341-1349.
13. Yawn BP, Saddier P, Wollan PC, et al. A population-based study of the incidence and complication rates of herpes zoster before zoster vaccine introduction. *Mayo Clin Proc* 2007;82: 1341-1349.
14. Kenneth E. Schmader, M.D. Epidemiology and Impact on Quality of Life of Postherpetic Neuralgia and Painful Diabetic Neuropathy. *The Clinical Journal of Pain*. 2002;18:350–354
15. NICE. NICE clinical guideline 96. Neuropathic pain: the pharmacological management of neuropathic pain in adults in non-specialist settings. National Institute for Health and Clinical Excellence. <http://www.nice.org.uk/guidance/CG96> (accessed 5 June 2010).
16. Decroix J, Partsch H, Gonzalez R, et al. Factors influencing pain outcome in herpes zoster: an observational study with valaciclovir. *J Eur Acad Dermatol Venereol* 2000; 14: 23-33
17. Panlilio LM, Christo PJ, Raja SN. Current management of postherpetic neuralgia. *Neurologist* 2002; 8 (6): 339-350
18. Paul J. Christo, Greg Hobelmann, David N. Maine. Post-Herpetic Neuralgia in Older Adults. *Drugs Aging* 2007; 24 (1): 1-19
19. Rowbotham M, Harden N, Stacey B, Bernstein P, Magnus-Miller L. Gabapentin for the treatment of postherpetic neuralgia: a randomized controlled trial. *JAMA* 1998;280: 1837-1842.
20. Rice AS, Maton S, Postherpetic Neuralgia Study Group. Gabapentin in postherpetic neuralgia: a randomised, double blind, placebo controlled study. *Pain* 2001; 94:215-224.
21. Van Marwijk HWJ, Bijl D, Adegrove HJ, et al. Antidepressant prescription for depression in general practice in the Netherlands. *Pharm World Sci* 2001; 23(2): 46-49
22. Gong Jing. Treatment of 40 Cases of post-herpetic neuralgia with Bloodletting and cupping. *Guide of China Medicine*. 2013 July;11(20):292-293
23. Zhao Ruiqin. Treatment of 40 Cases of post-herpetic neuralgia with Bloodletting. *Shanxi Journal of TCM*. 2011;32(5):595-597
24. Fang Xiaoyu, Han Limin, Wu Hongyu. Therapeutic Effect Observation on the treatment of post-herpetic neuralgia with electroacupuncture. *People's military medical*. 2013;12:1427-1428
25. JPT CHH, Green S. *Cochrane handbook for systematic reviews of interventions version 5.1*. 0[updated March 2011]. The Cochrane Collaboration 2011
26. Egger M, Davey Smith G, Schneider M, Minder C: Bias in meta-analysis detected by a simple,

1  
2  
3  
4  
5  
6  
7  
8  
9  
10  
11  
12  
13  
14  
15  
16  
17  
18  
19  
20  
21  
22  
23  
24  
25  
26  
27  
28  
29  
30  
31  
32  
33  
34  
35  
36  
37  
38  
39  
40  
41  
42  
43  
44  
45  
46  
47  
48  
49  
50  
51  
52  
53  
54  
55  
56  
57  
58  
59  
60

graphical test. BMJ 1997; 315:629–634.  
27. Deeks J, Higgins J, Altman D. Chapter 9: analysing data and undertaking meta-analyses. In:  
Higgins J, Green S editor(s). Cochrane Handbook for Systematic Reviews of Interventions.  
Chichester (UK): John Wiley & Sons, 2008.

For peer review only



## Appendices

### Appendix 1. OVID MEDLINE search strategy

1. randomized controlled trial. pt.
2. controlled clinical trial. pt.
3. randomized. ti, ab.
4. randomly. ti, ab.
5. trial. ti, ab.
6. groups. ti, ab.
7. or/1-6
8. exp acupuncture therapy, or acupuncture
9. acupressure. ti, ab.
10. (acupoint \$ or electroacupuncture or electro-acupuncture). ti, ab.
11. elongated needle \$. ti, ab.
12. (three edged needl \$ or three-edged needl). ti, ab.
13. (fire needling or warming needl). ti, ab.
14. auricular acupuncture. ti, ab.
15. pyonex. ti, ab.
16. moxibustion. ti, ab.
17. (pricking blood or bloodletting or blood-letting). ti, ab..
18. cupping. ti, ab.
19. Or/8-18
20. exp postherpetic neuralgia, or post-herpetic neuralgia
21. PHN. ti, ab.
22. herpes zoster. ti, ab.
23. shingles. ti, ab.
24. (neuralgia or postherpetic) . ti, ab.
25. herpes zoster. ti, ab.
26. Or/20-25
27. 7 and 19 and 26

This search strategy will be suitable for other electronic databases.

1  
2  
3  
4  
5  
6  
7  
8  
9  
10  
11  
12  
13  
14  
15  
16  
17  
18  
19  
20  
21  
22  
23  
24  
25  
26  
27  
28  
29  
30  
31  
32  
33  
34  
35  
36  
37  
38  
39  
40  
41  
42  
43  
44  
45  
46  
47  
48  
49  
50  
51  
52  
53  
54  
55  
56  
57  
58  
59  
60

Appendix 2 Figure 1. Flow chart of the systematic review

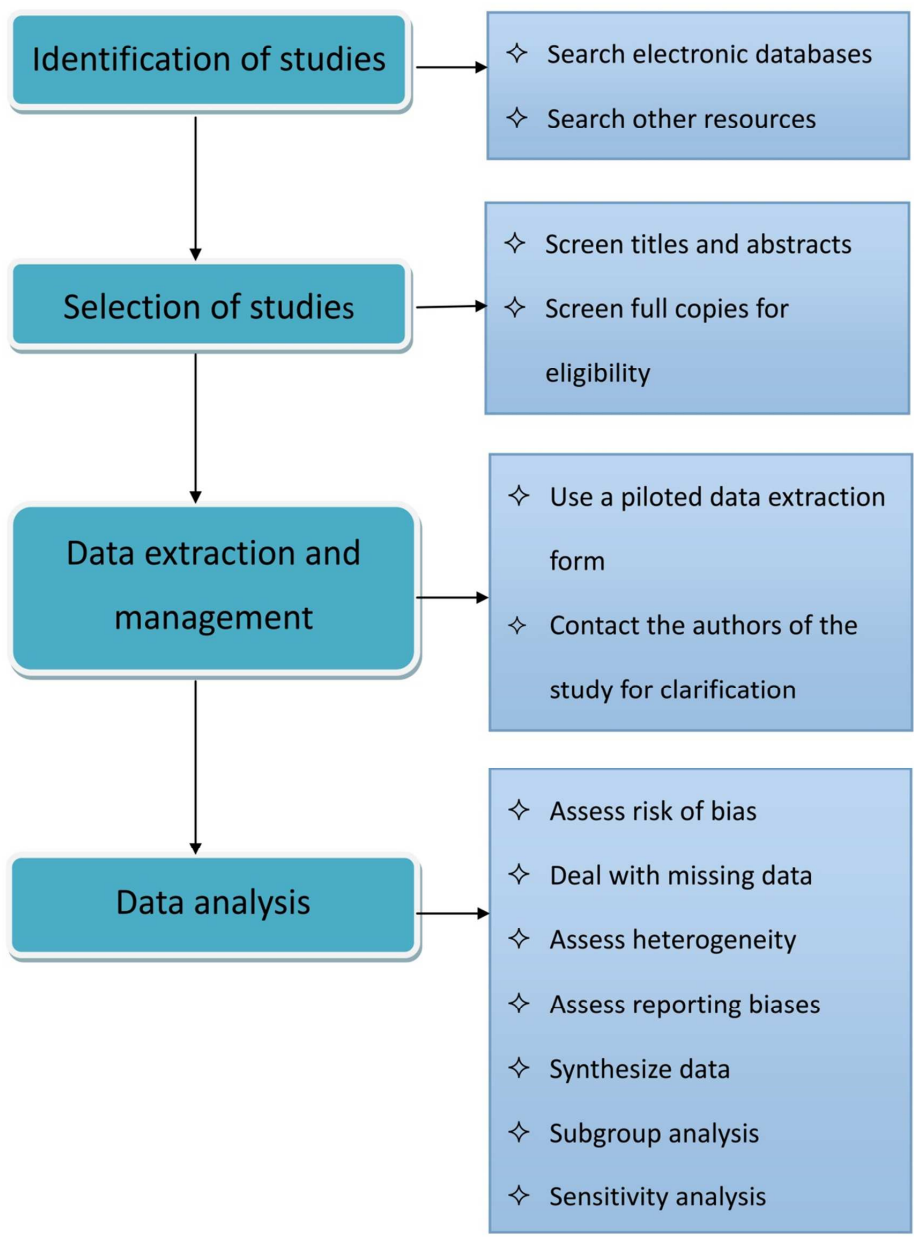

1  
2  
3  
4  
5  
6  
7  
8  
9  
10  
11  
12  
13  
14  
15  
16  
17  
18  
19  
20  
21  
22  
23  
24  
25  
26  
27  
28  
29  
30  
31  
32  
33  
34  
35  
36  
37  
38  
39  
40  
41  
42  
43  
44  
45  
46  
47  
48  
49  
50  
51  
52  
53  
54  
55  
56  
57  
58  
59  
60

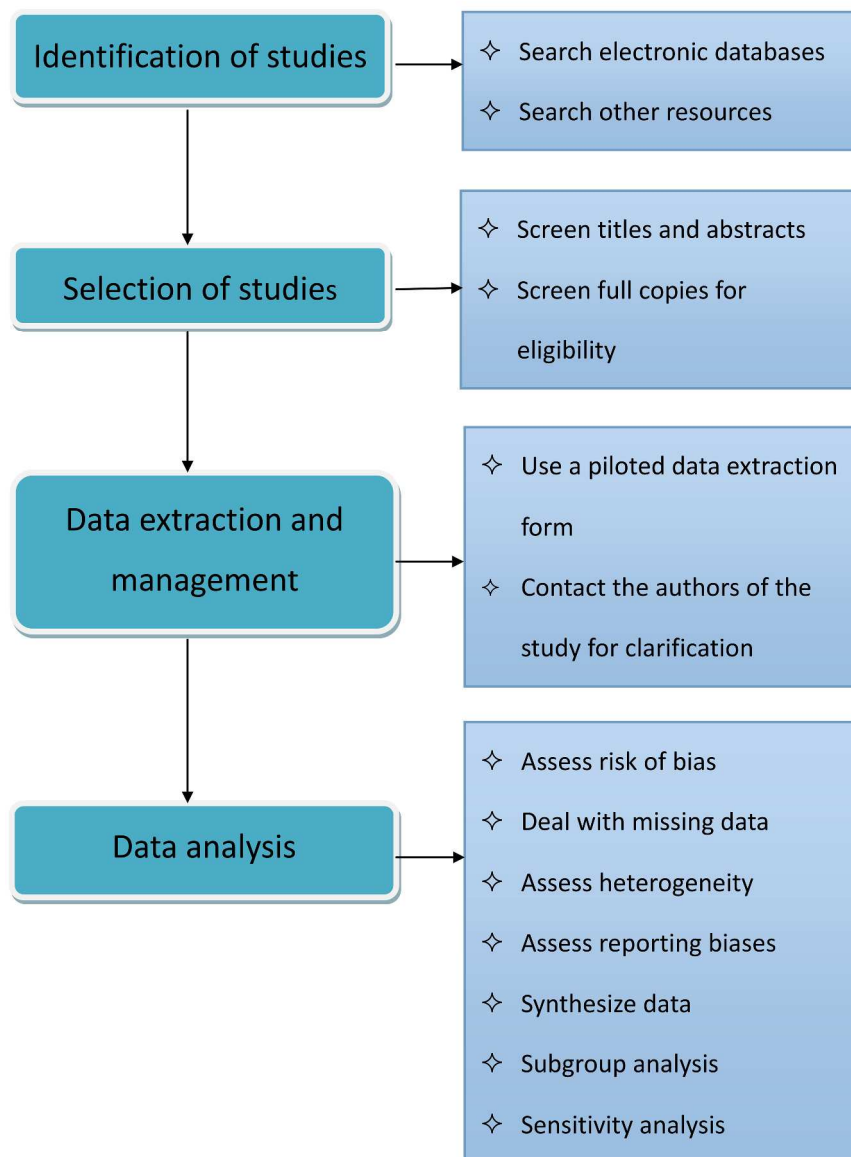

Flow chart of the systematic review  
218x300mm (600 x 600 DPI)

**Appendix 1. OVID MEDLINE search strategy**

1. randomized controlled trial. pt.
2. controlled clinical trial. pt.
3. randomized. ti, ab.
4. randomly. ti, ab.
5. trial. ti, ab.
6. groups. ti, ab.
7. or/1-6
8. exp acupuncture therapy, or acupuncture
9. acupressure. ti, ab.
10. (acupoint \$ or electroacupuncture or electro-acupuncture). ti, ab.
11. elongated needle \$. ti, ab.
12. (three edged needl \$ or three-edged needl). ti, ab.
13. (fire needling or warming needl). ti, ab.
14. auricular acupuncture. ti, ab.
15. pyonex. ti, ab.
16. moxibustion. ti, ab.
17. (pricking blood or bloodletting or blood-letting). ti, ab..
18. cupping. ti, ab.
19. Or/8-18
20. exp postherpetic neuralgia, or post-herpetic neuralgia
21. PHN. ti, ab.
22. herpes zoster. ti, ab.
23. shingles. ti, ab.
24. (neuralgia or postherpetic) . ti, ab.
25. herpes zoster. ti, ab.
26. Or/20-25
27. 7 and 19 and 26

This search strategy will be suitable for other electronic databases.
